# Supplementary material for: Resting nailfold capillary blood flow in primary open-angle glaucoma
Source: PubMed Central journal article supplement — Br J Ophthalmol. 2018 Apr 26;103(2):203–7. doi: 10.1136/bjophthalmol-2018-311846 (PMC6362805; doi:10.1136/bjophthalmol-2018-311846), 2018-04-26
Supplement: bjophthalmol-2018-311846supp001.pdf [file bjophthalmol-2018-311846supp001.pdf]

**Supplemental Table 1.** Multivariable logistic regression of nailfold capillary blood speed, diameter, and flow in relation to high tension glaucoma (HTG; n=30) or normal tension glaucoma (NTG; n=26) vs. controls (n=57)

| Exposure (covariates indented)            | HTG vs. Controls                     |                   | NTG vs. Controls                     |                |
|-------------------------------------------|--------------------------------------|-------------------|--------------------------------------|----------------|
|                                           | Odds ratio (95% confidence interval) | P value           | Odds ratio (95% confidence interval) | P value        |
| <b>Mean speed in microns per second</b>   | <b>0.991 (0.986, 0.995)</b>          | <b>&lt;0.0001</b> | <b>0.995 (0.991, 0.998)</b>          | <b>0.0025</b>  |
| Body mass index in kg/m <sup>2</sup>      | 0.97 (0.81, 1.14)                    | 0.74              | 1.00 (0.87, 1.15)                    | 0.98           |
| Mean arterial pressure in mmHg            | 0.97 (0.91, 1.03)                    | 0.37              | 0.98 (0.93, 1.03)                    | 0.43           |
| Pulse in beats per minute                 | 1.06 (1.00, 1.13)                    | 0.047             | 1.03 (0.97, 1.10)                    | 0.37           |
| Female sex                                | 0.12 (0.019, 0.54)                   | 0.011             | 2.05 (0.45, 10.7)                    | 0.37           |
| Age in years                              | 0.98 (0.91, 1.07)                    | 0.70              | 0.98 (0.92, 1.05)                    | 0.61           |
| Caucasian race                            | 2.01 (0.095, 37.6)                   | 0.63              | 2.47 (0.43, 16.4)                    | 0.32           |
| Connective tissue disease                 | 1.23 (0.24, 6.21)                    | 0.80              | 0.79 (0.14, 3.86)                    | 0.77           |
| Diabetes mellitus                         | 0.11 (0.0030, 1.53)                  | 0.15              | 0.32 (0.021, 3.05)                   | 0.36           |
| Use of blood thinning medication          | 0.88 (0.21, 3.75)                    | 0.86              | 0.50 (0.088, 2.66)                   | 0.41           |
| Use of blood pressure medication          | 0.80 (0.15, 4.39)                    | 0.79              | 1.08 (0.16, 7.49)                    | 0.93           |
| Ever smoker (vs. never)                   | 0.50 (0.11, 2.10)                    | 0.36              | 2.37 (0.62, 9.80)                    | 0.21           |
| <b>Mean diameter in microns</b>           | <b>0.79 (0.54, 1.12)</b>             | <b>0.19</b>       | <b>0.59 (0.35, 0.92)</b>             | <b>0.029</b>   |
| Body mass index in kg/m <sup>2</sup>      | 0.91 (0.79, 1.03)                    | 0.17              | 0.92 (0.80, 1.03)                    | 0.18           |
| Mean arterial pressure in mmHg            | 1.01 (0.97, 1.06)                    | 0.58              | 0.98 (0.93, 1.03)                    | 0.37           |
| Pulse in beats per minute                 | 1.04 (0.99, 1.09)                    | 0.12              | 1.01 (0.96, 1.07)                    | 0.70           |
| Female sex                                | 0.38 (0.12, 1.13)                    | 0.088             | 1.80 (0.42, 8.78)                    | 0.44           |
| Age in years                              | 0.98 (0.92, 1.05)                    | 0.55              | 0.95 (0.89, 1.02)                    | 0.18           |
| Caucasian race                            | 1.78 (0.17, 16.7)                    | 0.61              | 5.48 (0.93, 39.1)                    | 0.068          |
| Connective tissue disease                 | 1.00 (0.26, 3.64)                    | >0.99             | 0.85 (0.16, 3.99)                    | 0.84           |
| Diabetes mellitus                         | 0.20 (0.0079, 1.87)                  | 0.22              | 0.35 (0.028, 2.84)                   | 0.36           |
| Use of blood thinning medication          | 0.76 (0.22, 2.53)                    | 0.66              | 0.58 (0.12, 2.74)                    | 0.50           |
| Use of blood pressure medication          | 0.83 (0.22, 2.99)                    | 0.77              | 2.79 (0.48, 18.3)                    | 0.26           |
| Ever smoker (vs. never)                   | 1.18 (0.38, 3.65)                    | 0.77              | 2.91 (0.81, 11.6)                    | 0.11           |
| <b>Mean flow in picoliters per second</b> | <b>0.93 (0.89, 0.96)</b>             | <b>0.00010</b>    | <b>0.93 (0.89, 0.97)</b>             | <b>0.00072</b> |
| Body mass index in kg/m <sup>2</sup>      | 0.96 (0.81, 1.12)                    | 0.65              | 1.00 (0.86, 1.15)                    | 0.98           |
| Mean arterial pressure in mmHg            | 0.99 (0.93, 1.04)                    | 0.65              | 0.97 (0.92, 1.03)                    | 0.34           |
| Pulse in beats per minute                 | 1.06 (1.00, 1.13)                    | 0.043             | 1.04 (0.98, 1.12)                    | 0.22           |
| Female sex                                | 0.15 (0.029, 0.58)                   | 0.011             | 1.37 (0.26, 7.72)                    | 0.71           |
| Age in years                              | 0.97 (0.91, 1.04)                    | 0.42              | 0.97 (0.90, 1.04)                    | 0.36           |
| Caucasian race                            | 1.84 (0.11, 24.7)                    | 0.65              | 3.46 (0.54, 27.9)                    | 0.21           |
| Connective tissue disease                 | 1.19 (0.26, 5.32)                    | 0.82              | 0.69 (0.11, 3.78)                    | 0.67           |
| Diabetes mellitus                         | 0.11 (0.0028, 1.47)                  | 0.14              | 0.13 (0.0058, 1.80)                  | 0.17           |
| Use of blood thinning medication          | 0.71 (0.17, 2.87)                    | 0.63              | 0.36 (0.054, 2.07)                   | 0.26           |
| Use of blood pressure medication          | 1.00 (0.21, 4.94)                    | >0.99             | 1.88 (0.27, 14.0)                    | 0.52           |
| Ever smoker (vs. never)                   | 0.97 (0.24, 3.73)                    | 0.96              | 3.07 (0.75, 14.6)                    | 0.13           |
