# Supplementary material for: Resting nailfold capillary blood flow in primary open-angle glaucoma
Source: PubMed Central journal article supplement — Br J Ophthalmol. 2018 Apr 26;103(2):203–7. doi: 10.1136/bjophthalmol-2018-311846 (PMC6362805; doi:10.1136/bjophthalmol-2018-311846), 2018-04-26
Supplement: bjophthalmol-2018-311846supp002.pdf [file bjophthalmol-2018-311846supp002.pdf]

**Supplemental Table 2.** Multivariable logistic regression of nailfold capillary blood speed, diameter, and flow in relation to primary open-angle glaucoma (POAG) patients not using topical beta-blocker medication (n=26) or using topical beta-blocker medication (n=36) vs. controls (n=57)

| Exposure (covariates indented)            | POAG not using topical beta-blockers vs. Controls |               | POAG using topical beta-blocker in at least one eye vs. Controls |                   |
|-------------------------------------------|---------------------------------------------------|---------------|------------------------------------------------------------------|-------------------|
|                                           | Odds ratio (95% confidence interval)              | P value       | Odds ratio (95% confidence interval)                             | P value           |
| <b>Mean speed in microns per second</b>   | <b>0.994 (0.990, 0.997)</b>                       | <b>0.0013</b> | <b>0.993 (0.990, 0.996)</b>                                      | <b>&lt;0.0001</b> |
| Body mass index in kg/m <sup>2</sup>      | 0.99 (0.83, 1.17)                                 | 0.95          | 0.97 (0.84, 1.11)                                                | 0.68              |
| Mean arterial pressure in mmHg            | 0.99 (0.93, 1.06)                                 | 0.75          | 0.98 (0.93, 1.03)                                                | 0.45              |
| Pulse in beats per minute                 | 1.10 (1.02, 1.19)                                 | 0.015         | 1.03 (0.98, 1.08)                                                | 0.33              |
| Female sex                                | 0.59 (0.091, 3.49)                                | 0.56          | 0.59 (0.17, 1.92)                                                | 0.39              |
| Age in years                              | 1.00 (0.93, 1.08)                                 | 0.98          | 1.00 (0.94, 1.08)                                                | 0.97              |
| Caucasian race                            | 2.91 (0.32, 30.7)                                 | 0.34          | 3.60 (0.69, 22.8)                                                | 0.14              |
| Connective tissue disease                 | 0.49 (0.069, 2.77)                                | 0.44          | 0.81 (0.20, 3.20)                                                | 0.76              |
| Diabetes mellitus                         | 0.074 (0.0017, 1.55)                              | 0.12          | 0.17 (0.013, 1.31)                                               | 0.12              |
| Use of blood thinning medication          | 0.72 (0.11, 4.95)                                 | 0.73          | 0.68 (0.18, 2.44)                                                | 0.55              |
| Use of blood pressure medication          | 0.20 (0.020, 1.45)                                | 0.13          | 1.22 (0.30, 5.33)                                                | 0.78              |
| Ever smoker (vs. never)                   | 2.03 (0.51, 8.66)                                 | 0.32          | 1.08 (0.30, 3.87)                                                | 0.90              |
| <b>Mean diameter in microns</b>           | <b>0.67 (0.42, 1.01)</b>                          | <b>0.065</b>  | <b>0.74 (0.51, 1.06)</b>                                         | <b>0.11</b>       |
| Body mass index in kg/m <sup>2</sup>      | 0.90 (0.77, 1.03)                                 | 0.15          | 0.91 (0.81, 1.02)                                                | 0.12              |
| Mean arterial pressure in mmHg            | 1.00 (0.95, 1.06)                                 | 0.95          | 1.01 (0.97, 1.05)                                                | 0.67              |
| Pulse in beats per minute                 | 1.08 (1.02, 1.15)                                 | 0.018         | 1.01 (0.97, 1.06)                                                | 0.62              |
| Female sex                                | 0.61 (0.12, 3.08)                                 | 0.54          | 0.73 (0.26, 2.04)                                                | 0.55              |
| Age in years                              | 0.98 (0.92, 1.05)                                 | 0.58          | 0.98 (0.93, 1.05)                                                | 0.59              |
| Caucasian race                            | 4.20 (0.52, 37.8)                                 | 0.17          | 3.59 (0.80, 18.9)                                                | 0.11              |
| Connective tissue disease                 | 0.31 (0.047, 1.59)                                | 0.18          | 1.11 (0.33, 3.66)                                                | 0.86              |
| Diabetes mellitus                         | 0.13 (0.0033, 2.01)                               | 0.19          | 0.24 (0.025, 1.44)                                               | 0.15              |
| Use of blood thinning medication          | 0.63 (0.11, 3.52)                                 | 0.60          | 0.78 (0.24, 2.46)                                                | 0.68              |
| Use of blood pressure medication          | 0.44 (0.064, 2.69)                                | 0.38          | 1.55 (0.45, 5.50)                                                | 0.49              |
| Ever smoker (vs. never)                   | 3.14 (0.90, 12.4)                                 | 0.084         | 1.39 (0.45, 4.30)                                                | 0.56              |
| <b>Mean flow in picoliters per second</b> | <b>0.94 (0.90, 0.97)</b>                          | <b>0.0017</b> | <b>0.93 (0.90, 0.96)</b>                                         | <b>&lt;0.0001</b> |
| Body mass index in kg/m <sup>2</sup>      | 0.96 (0.81, 1.13)                                 | 0.67          | 0.96 (0.83, 1.09)                                                | 0.53              |
| Mean arterial pressure in mmHg            | 0.99 (0.93, 1.06)                                 | 0.82          | 0.98 (0.93, 1.03)                                                | 0.41              |
| Pulse in beats per minute                 | 1.10 (1.03, 1.20)                                 | 0.0095        | 1.03 (0.98, 1.09)                                                | 0.23              |
| Female sex                                | 0.31 (0.042, 1.87)                                | 0.21          | 0.54 (0.15, 1.80)                                                | 0.33              |
| Age in years                              | 0.98 (0.91, 1.06)                                 | 0.62          | 0.99 (0.93, 1.06)                                                | 0.73              |
| Caucasian race                            | 3.54 (0.37, 40.0)                                 | 0.28          | 4.58 (0.84, 31.6)                                                | 0.093             |
| Connective tissue disease                 | 0.41 (0.055, 2.39)                                | 0.35          | 0.87 (0.21, 3.50)                                                | 0.84              |
| Diabetes mellitus                         | 0.047 (0.00091, 1.13)                             | 0.084         | 0.11 (0.0069, 1.02)                                              | 0.078             |
| Use of blood thinning medication          | 0.43 (0.061, 2.86)                                | 0.38          | 0.65 (0.17, 2.41)                                                | 0.52              |
| Use of blood pressure medication          | 0.35 (0.039, 2.63)                                | 0.32          | 1.67 (0.40, 7.55)                                                | 0.48              |
| Ever smoker (vs. never)                   | 2.82 (0.70, 12.9)                                 | 0.16          | 1.50 (0.40, 5.72)                                                | 0.55              |
